# Supplementary material
Source: publisher figshare collection journal article supplement (https://gsajournals.figshare.com/ndownloader/files/14555720)
Supplement: Supplementary file 1 [file 14555720]

| Phylogenetic group | | | | Species | | Genome assembly version | FAT1 | | | | FAT2 | | | | FAT3 | | | |
| --- | --- | --- | --- | --- | --- | --- | --- | --- | --- | --- | --- | --- | --- | --- | --- | --- | --- | --- |
| Chondrichtyes | | | | ***Callorhinchus milli***  (elephant shark) | Cm | Callorhinchus_milii-6.1.3 GCF_000165045.1 | XP_007891006.1 | | | | XP_007900194.1 | | | | XP_007900407.1 | | | |
| Osteichtyes | Sacropterygii | Tetrapods | Reptiles | ***Pelodiscus sinensis***  (Chinese softshell turtle) | Ps | PelSin_1.0 GCF_000230535.1 | XP_006128510.1 | | | | XP_014436647.1 | | | | XP_025044455.1 | | | |
| Mammals | ***Homo sapiens***  (human) | Hs | GRCh38.p12 GCF_000001405.38 | NP_005236.2 | | | | NP_001438.1 | | | | NP_001354878.1 | | | |
| Actinopterygii | Holostei | | ***Lepisosteus oculatus***  (spotted gar) | Lo | LepOcu1 GCF_000242695.1 | XP_015201121.1 | | | | XP_015205333.1 | | | | XP_015197067.1 | | | |
| Teleosts |  | ***Teleost-specific 3R duplications :*** | | | **a** | | **b** | |  | |  | | **a** | | **b** | |
| ***Danio rerio***  (zebrafish) | Dr | GRCz11 GCF_000002035.6 | NP_998132.2 | | XP_009289440.2 | | XP_001920058.2 | |  | | XP_017206475.1 | | XP_009303578.2 | |
| ***Oreochromis niloticus***  (Nile tilapia) | On | O_niloticus_UMD_NMBU GCF_001858045.2 | XP_019215636.1 | |  | | XP_005453274.1 | |  | | XP_019200638.1 | | XP_019219701.1 | |
| Salmonids | ***+ Salmonid-specific 4R duplications :*** | | | **a1** | **a2** | **b1** | **b2** | **a1** | **a2** | **b1** | **b2** | **a1** | **a2** | **b1** | **b2** |
| ***Oncorhynchus kisutch***  (coho salmon) | Ok | Okis_V1 GCF_002021735.1 | XP_020343010.1 | XP_020351707.1 | XP_020357675.1 |  | XP_020359148.1 | XP_020364939.1 |  |  | XP_020364094.1 | XP_020357586.1 |  |  |
| ***Oncorhynchus mykiss***  (rainbow trout) | Om | Omyk_1.0 GCF_002163495.1 | XP_021429244.1 | XP_021474942.1 | XP_021438836.1 |  | XP_021438968.1 | XP_021417524.1 |  |  |  | XP_021437413.1 |  |  |
| ***Salmo salar***  (Atlantic salmon) | Ss | ICSASG_v2 GCF_000233375.1 | XP_014064455.1 | XP_014050726.1 | XP_014068291.1 |  | XP_014068735.1 | XP_014054096.1 |  |  | XP_014070618.1 | XP_014018822.1 |  |  |

*Note : depending on availability, protein references given as RefSeq, alternatively as Uniprot*
